# Supplementary material for: Burnout among surgeons before and during the SARS-CoV-2 pandemic: an international survey
Source: Springer Nature journal article supplement (doi:10.1186/s40359-023-01517-4), 2024-01-25
Supplement: MOESM2 [file 40359_2023_1517_MOESM2_ESM.pdf]

## Effect of COVID19 Pandemic on Surgeons' Job Satisfaction and Burnout

Your participation is very valuable

**Dear Surgeon, the primary purpose of this survey is to measure the effect of COVID 19 pandemic on the surgeons' satisfaction and burnout; this will help to understand the key drivers of satisfaction.**

**Participation in this survey is entirely voluntary, and the information collected will be anonymous, strictly confidential, and help institutes to plan better.**

**Any participant who will complete the Survey will be listed under "Surg-SAT-19 collaborators" in any paper deriving from this work and as such indexed in Pubmed by the journal.**

**Fill your name, email, and ORCID if you wish to be listed as a collaborator.**

**Kindly hit next if you are willing to participate.**

**We appreciate your participation and valuable comments.**

**SURG-SAT-19 Study group**

**Contact us:**

**[SURG.SAT.19@Gmail.com](mailto:SURG.SAT.19@Gmail.com)**

# Effect of COVID19 Pandemic on Surgeons' Job Satisfaction and Burnout

## Basic Information

1. In what country do you work?

2. What is your age? (in years)

3. What is your gender?

Female  Male  Prefer not to mention

4. Which of the following best describes your current relationship status?

Married  Widowed  Divorced  Single

5. Do you have any children?

Yes, all 18 or over  
 Yes, one or more under 18  
 No

6. How many years do you have in surgical practice?

7. What is your current designation?

Resident/ Trainee  
 Specialist/ Senior Specialist  
 Consultant

8. What is your specialty?

General Surgery  Neuro Surgery  Obstetrics and Gynecology  
 Plastic Surgery  Vascular Surgery  Oral and Maxillofacial  
 Cardiothoracic Surgery  Urology Surgery  Otolaryngology  
 Pediatric surgery  Orthopedics Surgery  
 Other (please specify)

9. In what type of community do you work in?

- City or urban community
- Rural community

10. In what type of institution do you work?

- Academic institution
- Non-academic
- Private
- Mixed

11. If you wish to list your name in our (collaborative group) in all papers derived from this work, fill your name and Email.

(OPTIONAL and individual data will remain confidential)

|                      |                      |
|----------------------|----------------------|
| Name                 | <input type="text"/> |
| Email                | <input type="text"/> |
| ORCID (If Available) | <input type="text"/> |

## Effect of COVID19 Pandemic on Surgeons' Job Satisfaction and Burnout

### Job satisfaction and burn out

The aim of this part is to measure your job satisfaction before and after the pandemic. kindly give a response to each question.

in the last two questions, you can select multiple responses.

#### \* 12. Surgery Job satisfaction before and during the pandemic

|                                                                          | Before the COVID-19 Pandemic | During the COVID-19 Pandemic |
|--------------------------------------------------------------------------|------------------------------|------------------------------|
| I will choose surgery as a career again (If I have the choice)           | <input type="text"/>         | <input type="text"/>         |
| I can cope with technical challenges                                     | <input type="text"/>         | <input type="text"/>         |
| I have enough case variety                                               | <input type="text"/>         | <input type="text"/>         |
| I use a full range of surgical skills in practice                        | <input type="text"/>         | <input type="text"/>         |
| I receive adequate financial compensation                                | <input type="text"/>         | <input type="text"/>         |
| I recommend surgery to the medical student                               | <input type="text"/>         | <input type="text"/>         |
| Malpractice experiences have affected job satisfaction                   | <input type="text"/>         | <input type="text"/>         |
| I feel well-respected in my community                                    | <input type="text"/>         | <input type="text"/>         |
| I can keep the right work-life balance                                   | <input type="text"/>         | <input type="text"/>         |
| I have enough time for family                                            | <input type="text"/>         | <input type="text"/>         |
| I have no issues with childcare responsibilities. (if you have children) | <input type="text"/>         | <input type="text"/>         |

\* 13. Manifestations of burnout

|                                                                           | Before the COVID-19 Pandemic | During the COVID-19 Pandemic |
|---------------------------------------------------------------------------|------------------------------|------------------------------|
| I feel tired                                                              | <input type="text"/>         | <input type="text"/>         |
| I have no energy for going to work in the morning                         | <input type="text"/>         | <input type="text"/>         |
| I feel fed up                                                             | <input type="text"/>         | <input type="text"/>         |
| I feel like my "batteries" are "dead"                                     | <input type="text"/>         | <input type="text"/>         |
| I feel burned out                                                         | <input type="text"/>         | <input type="text"/>         |
| I feel Difficulty concentrating                                           | <input type="text"/>         | <input type="text"/>         |
| I feel I am unable to be sensitive to the needs of coworkers and patients | <input type="text"/>         | <input type="text"/>         |

## Effect of COVID19 Pandemic on Surgeons' Job Satisfaction and Burnout

### Changes in Career practice and resources

The following questions are related to your career practice, you are expected to give two answers on each question before and during the COVID-19 pandemic. Kindly pick the range that represents your answer.

\* 14. Career practice before and during pandemic (kindly provide the approximate range)

|                                              | Before COVID 19 Pandemic | During COVID 19 Pandemic |
|----------------------------------------------|--------------------------|--------------------------|
| Participation in research work (PER YEAR)    | <input type="text"/>     | <input type="text"/>     |
| Hours spent reading scientific articles/week | <input type="text"/>     | <input type="text"/>     |
| Clinical cases in outpatient clinic/week     | <input type="text"/>     | <input type="text"/>     |
| Operative cases/ week                        | <input type="text"/>     | <input type="text"/>     |
| Cases working as primary surgeon/week        | <input type="text"/>     | <input type="text"/>     |
| Case working as assistant surgeon/week       | <input type="text"/>     | <input type="text"/>     |
| Hours working on call/week                   | <input type="text"/>     | <input type="text"/>     |
| Hours working at home/week                   | <input type="text"/>     | <input type="text"/>     |
| Number of emergency case/week                | <input type="text"/>     | <input type="text"/>     |

\* 15. Role During the pandemic

|                                                                      | Yes                   | No                    | NA                    |
|----------------------------------------------------------------------|-----------------------|-----------------------|-----------------------|
| My hospital was included to treat COVID-19 Cases                     | <input type="radio"/> | <input type="radio"/> | <input type="radio"/> |
| I was included in COVID-19 patient management team                   | <input type="radio"/> | <input type="radio"/> | <input type="radio"/> |
| I was in contact with COVID-19 positive cases                        | <input type="radio"/> | <input type="radio"/> | <input type="radio"/> |
| I was asked to share in medical practice away from my surgical field | <input type="radio"/> | <input type="radio"/> | <input type="radio"/> |
| I felt my clinical role was minimized during the pandemic            | <input type="radio"/> | <input type="radio"/> | <input type="radio"/> |

\* 16. How do you evaluate the availability of resources during the pandemic?

|                                         | Sufficient            | Neutral               | Insufficient          |
|-----------------------------------------|-----------------------|-----------------------|-----------------------|
| Surgical Training resources             | <input type="radio"/> | <input type="radio"/> | <input type="radio"/> |
| Surgical research resources             | <input type="radio"/> | <input type="radio"/> | <input type="radio"/> |
| Knowledge resources regarding pandemic  | <input type="radio"/> | <input type="radio"/> | <input type="radio"/> |
| Required skills regarding the pandemic  | <input type="radio"/> | <input type="radio"/> | <input type="radio"/> |
| Required protection during the pandemic | <input type="radio"/> | <input type="radio"/> | <input type="radio"/> |

17. In general, What would have helped a better situation for you during the pandemic?
